# Supplementary material for: Management of Patients with Type V Hyperlipoproteinemia: An Uncommon Phenotype of Dyslipidemia with Chylomicronemia and Severe Hypertriglyceridemia
Source: MDPI journal article supplement (doi:10.3390/jpm13010068), 2022-12-28
Supplement: s1 [file s1]

## Supplementary Material

**Table S1. Diagnostic criteria and possible pathogenic mechanisms of each FLL type of HLP in the present study\***

| Type                       | Diagnostic criteria**                                                                                                                                                                                        | Possible pathogenic mechanisms                                                                                                                                                                                                                                                                                                                                                                                                                                                                        |
|----------------------------|--------------------------------------------------------------------------------------------------------------------------------------------------------------------------------------------------------------|-------------------------------------------------------------------------------------------------------------------------------------------------------------------------------------------------------------------------------------------------------------------------------------------------------------------------------------------------------------------------------------------------------------------------------------------------------------------------------------------------------|
| <b>Type 1<br/>(HLP1)</b>   | <ul style="list-style-type: none"> <li>- ApoB &lt;75 mg/dL</li> <li>- TG ≥150 mg/dL</li> <li>- TG/apoB ratio ≥8.8</li> <li>- Presence of chylomicrons on LPEP</li> </ul>                                     | HLP1 is a very rare disorder with homozygous mutation in <i>LPL</i> , <i>GHIHBP1</i> , <i>APOC2</i> , <i>APOA5</i> , or <i>LMF1</i> genes and deficiency of lipoprotein lipase (LPL).                                                                                                                                                                                                                                                                                                                 |
| <b>Type 2a<br/>(HLP2a)</b> | <ul style="list-style-type: none"> <li>- ApoB ≥120 mg/dL</li> <li>- TG &lt;150 mg/dL</li> <li>- Absence of chylomicrons on LPEP</li> </ul>                                                                   | HLP2a is a common polygenic lipid disorder with hypercholesterolemia and high LDL-C which may be associated with dietary and environmental factors. However, the most severe presentation of HLP2a is familial hypercholesterolemia which is resulted from homozygous or heterozygous mutation in <i>LDLR</i> , <i>APOB</i> , or <i>PCSK9</i> genes.                                                                                                                                                  |
| <b>Type 2b<br/>(HLP2b)</b> | <ul style="list-style-type: none"> <li>- ApoB ≥120 mg/dL</li> <li>- TG ≥150 mg/dL</li> <li>- Absence of chylomicrons on LPEP</li> </ul>                                                                      | HLP2b is a common polygenic lipid disorder with hypercholesterolemia and mild hypertriglyceridemia (HTG) which is usually associated with dietary and environmental factors.                                                                                                                                                                                                                                                                                                                          |
| <b>Type 3<br/>(HLP3)</b>   | <ul style="list-style-type: none"> <li>- ApoB ≥120 mg/dL</li> <li>- TG/apoB ratio &lt;8.8</li> <li>- TC/apoB ratio ≥2.4</li> <li>- The presence of broad-β band on LPEP</li> </ul>                           | The cause of HLP3 is a specific presentation (ε2/ε2) of <i>APOE</i> gene polymorphism.                                                                                                                                                                                                                                                                                                                                                                                                                |
| <b>Type 4<br/>(HLP4)</b>   | <ul style="list-style-type: none"> <li>- ApoB &lt;120 mg/dL</li> <li>- TG ≥150 mg/dL</li> <li>- TG/apoB ratio &lt;8.8</li> <li>- TC/apoB ratio &lt;2.4</li> <li>- Absence of chylomicrons on LPEP</li> </ul> | HLP4 is a very common presentation of lipid disorder and mainly caused by metabolic disorders (e.g., obesity, insulin resistance, and diabetes).                                                                                                                                                                                                                                                                                                                                                      |
| <b>Type 5<br/>(HLP5)</b>   | <ul style="list-style-type: none"> <li>- ApoB &lt;120 mg/dL and ≥75 mg/dL</li> <li>- TG ≥150 mg/dL</li> <li>- TG/apoB ratio ≥8.8</li> <li>- Presence of chylomicrons on LPEP</li> </ul>                      | HLP5 is caused by heterozygous mutation in <i>LPL</i> , <i>GHIHBP1</i> , <i>APOC2</i> , <i>APOA5</i> , or <i>LMF1</i> genes, or burdens of single nucleotide polymorphisms in multiple TG-associated genes (i.e., <i>DOCK7</i> , <i>ANGPTL3</i> , <i>GALNT2</i> , <i>KLHL8</i> , <i>AFF1</i> , <i>MAP3K1</i> , <i>ANKRD55</i> , <i>MLXIPL</i> , <i>NAT2</i> , <i>TRIB1</i> , <i>JMJD1C</i> , <i>FADS1</i> , <i>FADS2</i> , <i>FADS3</i> , <i>APOA1</i> , <i>APOC3</i> , <i>APOA4</i> , <i>CAPN3</i> , |

|  |  |                                                                                                                                                                     |
|--|--|---------------------------------------------------------------------------------------------------------------------------------------------------------------------|
|  |  | <i>FRMD5, CETP, SUGP1, PLTP, GCKR, CYP26A1, CILP2</i> ) accompanied by secondary metabolic or environmental factors (i.e., obesity, alcohol drinking, or diabetes). |
|--|--|---------------------------------------------------------------------------------------------------------------------------------------------------------------------|

Abbreviations: ApoB = apolipoprotein B; FLL = Fredrickson, Levy, and Lees; HLP = hyperlipoproteinemia; LPEP = lipoprotein electrophoresis; TC = total cholesterol; TG = triglyceride; VLDL = very-low density lipoprotein.

\*The unit of each lipid parameter used in the present study was mg/dL.

\*\*Each characteristic should be met.

| <b>Table S2. Study variables in the present study</b> |                                                                                                                                                                                                                                                                                          |
|-------------------------------------------------------|------------------------------------------------------------------------------------------------------------------------------------------------------------------------------------------------------------------------------------------------------------------------------------------|
| <b>Variables</b>                                      | <b>Definition and description</b>                                                                                                                                                                                                                                                        |
| <b>Age</b>                                            |                                                                                                                                                                                                                                                                                          |
| <b>Sex</b>                                            | Male or female                                                                                                                                                                                                                                                                           |
| <b>Weight</b>                                         | Unit: kilogram                                                                                                                                                                                                                                                                           |
| <b>Height</b>                                         | Unit: cm                                                                                                                                                                                                                                                                                 |
| <b>Smoking habit</b>                                  | Current smoker                                                                                                                                                                                                                                                                           |
| <b>Body mass index</b>                                | Weight in kilograms divided by the square of height in meters                                                                                                                                                                                                                            |
| <b>Coronary artery disease (CAD)</b>                  | defined as those who had > 50% diameter stenosis of major epicardial coronary arteries confirmed by coronary computed tomography (CT) angiography or coronary angiography                                                                                                                |
| <b>Ischemic stroke (IS)</b>                           | Determined by the neurologist's records with confirmation by brain CT or magnetic resonance imaging                                                                                                                                                                                      |
| <b>Peripheral arterial disease (PAD)</b>              | Confirmed by ankle-brachial index < 0.9 or > 1.4 and/or > 50% diameter stenosis of peripheral arteries observed in CT angiography                                                                                                                                                        |
| <b>Diabetes mellitus (DM)</b>                         | Determined by medical records and prescribed medications                                                                                                                                                                                                                                 |
| <b>Hypertension (HTN)</b>                             |                                                                                                                                                                                                                                                                                          |
| <b>Pancreatitis</b>                                   | Identified by patients' admission records together with detection of raised circulating pancreatic enzyme and pancreatic CT scans                                                                                                                                                        |
| <b>Prescribed medications</b>                         | Antiplatelet, beta-blocker, angiotensin con-verting enzyme inhibitor/angiotensin receptor blocker (ACEI/ARB), and lipid-lowering therapy (LLT) including statin, ezetimibe, proprotein convertase subtilisin/kexin type 9 (PCSK9) inhibitor, fenofibrate, niacin, and omega-3 fatty acid |

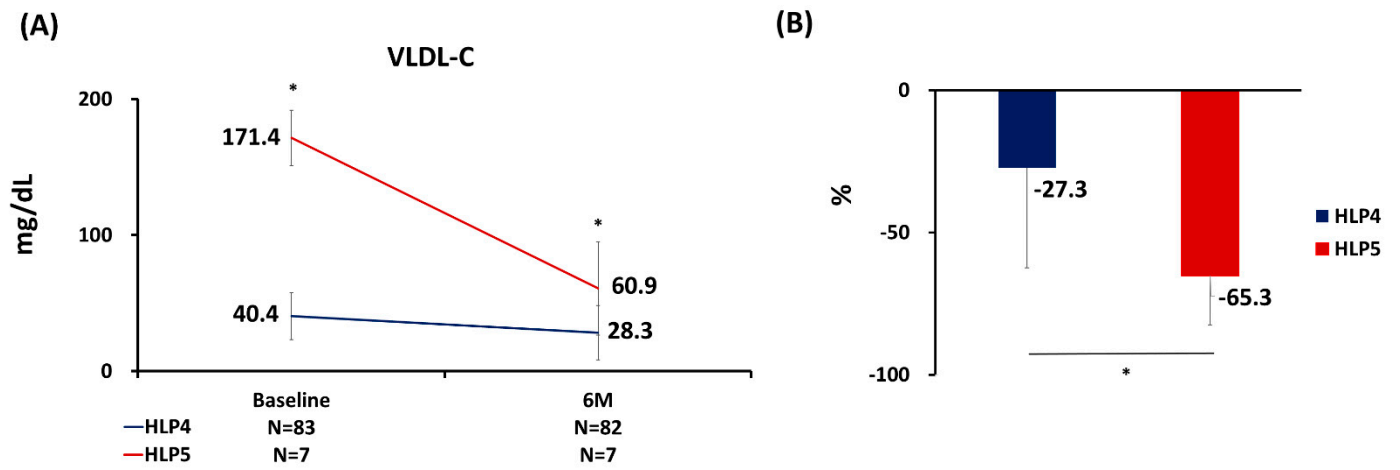

**Figure S1.** Illustration of plasma VLDL-C and percentages of change in plasma VLDL-C among patients. (A) Plasma VLDL-C. (B) Percentages of change in plasma VLDL-C. HLP4 = type IV hyperlipoproteinemia; HLP5 = type V hyperlipoproteinemia; N = numbers; VLDL-C = very-low-density lipoprotein cholesterol.
